# Supplementary material for: Microbiome Changes in Humans with Parkinson’s Disease after Photobiomodulation Therapy: A Retrospective Study
Source: MDPI journal article supplement (doi:10.3390/jpm12010049), 2022-01-05
Supplement: s1 [file s1]

**Table S1.** Parameters of the photobiomodulation devices and treatment regimens used in the study.

| PARAMETER                       | IRRADIA 904 nm LASER        | VIELIGHT NEURO GAMMA     |                       |                       |
|---------------------------------|-----------------------------|--------------------------|-----------------------|-----------------------|
| Manufacturer                    | Spectra Analytic Irradia AB | Vielight Inc.            |                       |                       |
| Diodes                          | 904nm laser diodes (GaAs)   | 5 x LED diodes           |                       |                       |
| Wavelength                      | 904nm                       | 810 nm                   |                       |                       |
| Laser class                     | 1                           | -                        |                       |                       |
|                                 |                             | posterior                | anterior              | nasal                 |
| Number of diodes                | 4                           | 3                        | 1                     | 1                     |
| Output power                    | 30 mW                       | 100 mW                   | 75 mW                 | 25mW                  |
| Peak power                      | 25,000 mW                   |                          |                       |                       |
| Pulse frequency                 | 50 Hz                       | 40 Hz                    | 40 Hz                 | 40 Hz                 |
| Beam spot size                  | 0.635 cm <sup>2</sup>       | ~1 cm                    | ~1 cm                 | ~1 cm                 |
| Power density per diode         | 47 mW/cm <sup>2</sup>       | 100 mW/cm <sup>2</sup>   | 75 mW/cm <sup>2</sup> | 25 mW/cm <sup>2</sup> |
| Total output power              | 120 mW                      | 400 mW                   |                       |                       |
| Irradiation time per point      | 30 s                        | 2100 s                   |                       |                       |
| Total irradiation time          | 330 s                       | 2100 s                   |                       |                       |
| Total energy per point          | 3.6 J                       | 60 J                     | 45 J                  | 15 J                  |
| Number of sites                 | 11 (9 abdomen, 2 neck)      | 3                        | 1                     | 1                     |
| Total energy dose per treatment | 39.6 J                      | 180 J                    | 45 J                  | 15 J                  |
| Treatment frequency             |                             |                          |                       |                       |
| weeks 1 to 4                    | 3 x per week for 4 weeks    | 3 x per week for 4 weeks |                       |                       |
| weeks 5 to 8                    | 2 x per week for 4 weeks    | 2 x per week for 4 weeks |                       |                       |
| weeks 9 to 12                   | 1 x per week for 4 weeks    | 1 x per week for 4 weeks |                       |                       |
